# Supplementary material
Source: publisher figshare collection journal article supplement (https://tandf.figshare.com/ndownloader/files/22078308)
Supplement: Supplementary file 1 [file 22078308]

## **Online Supplemental Material**

### **Changes in PM<sub>2.5</sub> sensitivity to NO<sub>x</sub> and NH<sub>3</sub> emissions due to a large decrease in SO<sub>2</sub> emissions from 2013 to 2018**

Guangyi XU<sup>a</sup>, Qianqian ZHANG<sup>b,c</sup>, Yu YAO<sup>d</sup> and Xingying ZHANG<sup>b</sup>

<sup>a</sup>Shenzhen Research Academy of Environmental Science, Shenzhen, China; <sup>b</sup>National Satellite Meteorological Center, China Meteorology Administration, Beijing, China; <sup>c</sup>State Environmental Protection Key Laboratory of Sources and Control of Air Pollution Complex, Beijing, China; <sup>d</sup>Department of Atmospheric Sciences, University of Illinois at Urbana Champaign, Urbana, USA

**This file includes:  
Supplementary Figures S1**

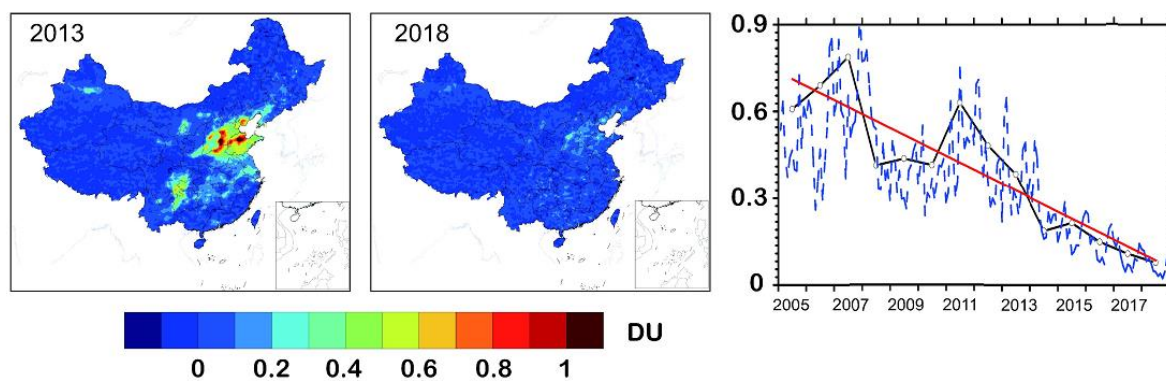

Figure S1. Annual mean SO<sub>2</sub> column over China for the year 2013 and 2018, and monthly SO<sub>2</sub> column over East China (110°E–122°E, 28°N–42°N) from January 2013 to December 2018. The data is derived from the Ozone Monitoring Inspector (OMI) on board the Aura satellite.
